# Supplementary material for: Expression patterns of a circadian clock gene are associated with age-related polyethism in harvester ants, Pogonomyrmex occidentalis
Source: PubMed Central journal article supplement (PMC2676274; doi:10.1186/1472-6785-9-7), 2009-04-17
Supplement: 1472-6785-9-7-S1.pdf [file 1472-6785-9-7-S1.pdf]

Additional File 1:

Degenerate primers for cloning of *PoPer*:

| Primer Name | Sequence (5'-3')                 | Corresponding Conserved AA sequence |
|-------------|----------------------------------|-------------------------------------|
| MBF03_F     | CTGCGTGATCTCCatgcaygaygg         | CCVISMHDGL                          |
| GEF01_F     | CCGTCCTACAACCAGCTGaaytayaayga    | PSYNQLNYNE                          |
| GER02_R     | GAAGAAGCGCTCGATGTTTcrttrtartt    | YNENIERFFK                          |
| MIR06_R     | CGGTGCTTCTTCATCATCAACttytccatntc | DMEKLMMLKHR                         |

Cloning procedure and real time qPCR primers:

Conserved blocks of amino acid sequence from known *period* genes in *Drosophila melanogaster*, *Apis mellifera*, *Bombus ardens*, and *Formica japonica* were identified with the CODEHOP program [36, 37]. Amplification of products from genomic DNA with CODEHOP degenerative primers was achieved using the standard protocol described in [36, 37] using Qiagen® PCR Core Kit reagents. Products of correct size were purified using Qiaquick PCR Clean-Up kits (Qiagen®) and cloned using a TOPO TA cloning kit (Invitrogen®). Clones were re-amplified in a new PCR reaction, purified with Sephadex® G50 spin columns and sequenced using an ABI 377 instrument with Big-Dye chemistry (ABI). Internal primers specific to *P. occidentalis* were designed and cDNA was amplified using these specific primers. Harvester ant-specific primers were designed from exon-coding regions to amplify a 90bp region for qPCR analyses. Clone sequences for PoRPII (endogenous control gene) and PoPer can be accessed on Genbank (Accession # FJ853425 & FJ853426). Real time primers (PoPerF: 5'-TCCTTCAGGTTCGAAGCCGT-3'; PoPerR:5'-TGATAAAGGACGACCACTCGG-3') and Taqman® probe (PoPerT:5'DFAM-CAGATTCGCCGTGCAGAACGGG-3'DTAM) were designed using Primer Express® software (ABI). The endogenous control gene, RNA Polymerase II subunit 215 (*RPII*), was amplified with harvester ant *RPII*-specific forward and reverse primers (Forward: 5'-GAGAACCAAGTGAACAGGAT-3', Reverse: 5'-TTATTGTATTTCAGTCAGGGATTTC-3') and TaqMan probe (5'DFAM-AGAGCCTCCAGTCTTGTCTCGA-3'DTAM).
